# Supplementary material
Source: PubMed Central journal article supplement (PMC2996134)

***Supplementary Fig. 1. Stimulation of CD8<sup>+</sup> CL-4 T cells with the variant epitope results in decreased OX40 expression.***

CD8<sup>+</sup> CL-4 T cells were stimulated with 10<sup>-6</sup>M PR/8 agonist or Japan variant viral epitopes and analyzed by flow cytometry for cell surface OX40 expression. Histograms represent live-gated Thy1.2<sup>+</sup> cells. Shaded histograms, isotype controls. Numbers indicate mean fluorescence intensity.

Supplementary Figure 1.  
Ream et al.

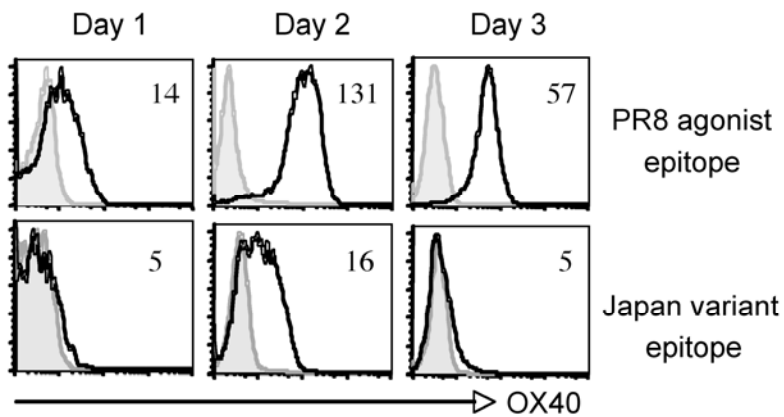

Supplement: NIHMS222298-supplement.pdf [file NIHMS222298-supplement.pdf]
